# Supplementary material for: Paracetamol therapy and outcome of critically ill patients: a multicenter retrospective observational study
Source: Springer Nature journal article supplement (doi:10.1186/s13054-015-0865-1), 2015-03-29
Supplement: MOESM1 [file 9780356]

## Additional file 1 (pdf)

### Title: Electronic appendix to paracetamol study

#### eTEXT 1.

#### APACHE admission diagnosis with infection

APACHE admission diagnosis consistent with infection:

- **nonoperative:** pneumonia, parasitic pneumonia, bacterial pneumonia, viral pneumonia, gastrointestinal tract perforation, gastrointestinal tract obstruction, neurologic infection, cellulitis or soft tissue infection;
- **postoperative:** respiratory infection, gastrointestinal tract perforation or rupture, cholecystitis or cholangitis, fistula or abscess surgery, peritonitis, cellulitis or soft tissue infection.

Figure E 1: Frequency distribution for the administration of the first dose of paracetamol\*

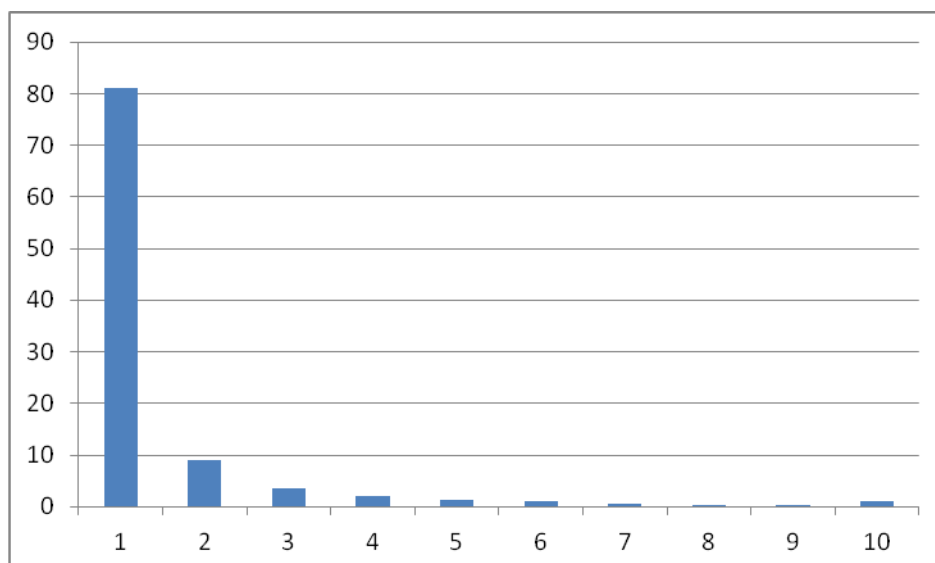

- 90% of patients treated with paracetamol had their first exposure in the first 2 days.

**Table E-1: Variables retained in the propensity model to receive paracetamol during ICU stay**

| Variables                                                             | Odds Ratio<br>(95% Confidence Interval) | P value |
|-----------------------------------------------------------------------|-----------------------------------------|---------|
| Admission date                                                        | 1.001 (1.001-1.001)                     | <0.001  |
| Age                                                                   | 1.003 (1.001-1.006)                     | 0.009   |
| Respiratory rate                                                      | 1.007 (1.003-1.011)                     | <0.001  |
| SAPS2                                                                 | 0.987 (0.985-0.989)                     | <0.001  |
| Facility (Ref =Hospital D)                                            |                                         |         |
| Hospital A                                                            | 0.852 (0.737-0.985)                     | 0.030   |
| Hospital B                                                            | 0.581 (0.501-0.674)                     | <0.001  |
| Hospital C                                                            | 1.630 (1.422-1.869)                     | <0.001  |
| Elective surgery                                                      | 1.180 (1.050-1.327)                     | 0.006   |
| Intratracheal intubation                                              | 1.319 (1.022-1.704)                     | 0.03    |
| Acute renal failure <sup>1</sup>                                      | 0.820 (0.705-0.955)                     | 0.01    |
| Mechanical ventilation <sup>2</sup>                                   | 1.309 (1.014-1.691)                     | 0.04    |
| Number of comorbidities <sup>3</sup>                                  | 0.679 (0.616-0.748)                     | <0.001  |
| Burns                                                                 | 0.364 (0.087-1.522)                     | 0.16    |
| Trauma                                                                | 1.903 (1.532-2.365)                     | <0.001  |
| Sepsis                                                                | 1.704 (1.422-2.042)                     | <0.001  |
| Cardiac arrest <sup>4</sup>                                           | 0.566 (0.458-0.701)                     | <0.001  |
| Hospital admission Source: other hospital                             | 1.227 (1.112-1.354)                     | <0.001  |
| Source of admission to ICU                                            |                                         |         |
| Operating theatre                                                     | 3.775 (2.768-5.148)                     | <0.001  |
| Emergency department                                                  | 1.693 (1.248-2.297)                     | 0.001   |
| Hospital floor                                                        | 2.692 (1.973-3.674)                     | <0.001  |
| Other hospital                                                        | 2.335 (1.702-3.205)                     | <0.001  |
| Treatment limitations on admission                                    | 0.382 (0.302-0.483)                     | <0.001  |
| Primary diagnosis according to APACHE III classification <sup>5</sup> |                                         |         |
| Cardiovascular (y/n)                                                  | 1.385 (1.223-1.568)                     | <0.001  |
| Gastrointestinal (y/n)                                                | 0.598 (0.522-0.684)                     | <0.001  |
| Haematology (y/n)                                                     | 1.882 (0.819-4.325)                     | 0.13    |
| Metabolic (y/n)                                                       | 0.375 (0.305-0.461)                     | <0.001  |
| Respiratory (y/n)                                                     | 1.219 (1.061-1.401)                     | 0.005   |

1. 24 hour urine output is < 410ml AND creatinine > 133 µmol/L AND patient is not receiving chronic dialysis.
2. Mechanical ventilation within 24 hours of ICU admission
3. AIDS, Hepatic failure, Lymphoma, Metastatic cancer, Leukaemia/Myeloma, Immunosuppressed, Cirrhosis

4. Cardiac arrest within the previous 24 hours
5. Covers both non-operative and post-operative admissions

**Table E2 - Propensity model and matching**

| <b>Existing propensity model</b> |              |         |         |           |  |
|----------------------------------|--------------|---------|---------|-----------|--|
| variable                         | OddsRatioEst | LowerCL | UpperCL | ProbChiSq |  |
| Age                              | 1.00         | 1.00    | 1.01    | 0.0094    |  |
| AP3_Cardiovasc                   | 1.39         | 1.22    | 1.57    | 0.0000    |  |
| AP3_Gastrointe                   | 0.60         | 0.52    | 0.68    | 0.0000    |  |
| AP3_Haematolog                   | 1.88         | 0.82    | 4.32    | 0.1366    |  |
| AP3_Metabolic                    | 0.38         | 0.30    | 0.46    | 0.0000    |  |
| AP3_Respirator                   | 1.22         | 1.06    | 1.40    | 0.0052    |  |
| AP3_sepsis                       | 1.70         | 1.42    | 2.04    | 0.0000    |  |
| AP3_Trauma                       | 1.90         | 1.53    | 2.36    | 0.0000    |  |
| ARF01                            | 0.82         | 0.70    | 0.95    | 0.0107    |  |
| Burns                            | 0.36         | 0.09    | 1.52    | 0.1663    |  |
| CardiacArrest                    | 0.57         | 0.46    | 0.70    | 0.0000    |  |
| COMORB7                          | 0.68         | 0.62    | 0.75    | 0.0000    |  |
| ELECT01                          | 1.18         | 1.05    | 1.33    | 0.0055    |  |
| HOS_ADM_OthHOS                   | 1.23         | 1.11    | 1.35    | 0.0000    |  |
| HOSPITAL_A                       | 0.85         | 0.74    | 0.98    | 0.0302    |  |
| HOSPITAL_B                       | 0.58         | 0.50    | 0.67    | 0.0000    |  |
| HOSPITAL_C                       | 1.63         | 1.42    | 1.87    | 0.0000    |  |
| ICU_AD_DT                        | 1.00         | 1.00    | 1.00    | 0.0000    |  |
| ICU_ADM_EMERG                    | 1.69         | 1.25    | 2.30    | 0.0007    |  |
| ICU_ADM_OT                       | 3.77         | 2.77    | 5.15    | 0.0000    |  |
| ICU_ADM_OthHOS                   | 2.34         | 1.70    | 3.21    | 0.0000    |  |
| ICU_ADM_WARD                     | 2.69         | 1.97    | 3.67    | 0.0000    |  |
| INTUBATED01                      | 1.32         | 1.02    | 1.70    | 0.0336    |  |
| RR                               | 1.01         | 1.00    | 1.01    | 0.0003    |  |
| SAPS2                            | 0.99         | 0.98    | 0.99    | 0.0000    |  |
| TreatLimitorPall                 | 0.38         | 0.30    | 0.48    | 0.0000    |  |
| VENTILATED01                     | 1.31         | 1.01    | 1.69    | 0.0391    |  |

Table E3: Hazard ratios (95%CI) for Cox models (Panadol vs no Panadol) after excluding early deaths and discharges<sup>1</sup>

| Categories                             | HR    | low95%CI | High95%CI |
|----------------------------------------|-------|----------|-----------|
| All                                    | 0.646 | 0.581    | 0.717     |
| Temp>38, medical admission & infection | 0.699 | 0.49     | 0.997     |
| Temp>38, no infection                  | 0.874 | 0.729    | 1.047     |
| by Surgery (No)                        | 0.686 | 0.606    | 0.776     |
| by Surgery (Yes)                       | 0.602 | 0.49     | 0.738     |
| by Temp>38 (No)                        | 0.582 | 0.502    | 0.675     |
| by Temp > 38 (Yes)                     | 0.842 | 0.718    | 0.988     |
| By diagnostic category                 |       |          |           |
| Other                                  | 0.263 | 0.059    | 1.18      |
| Trauma                                 | 0.501 | 0.253    | 0.992     |
| Neurologic                             | 0.586 | 0.46     | 0.745     |
| Gastrointestinal                       | 0.637 | 0.479    | 0.847     |
| Cardiovascular                         | 0.659 | 0.539    | 0.805     |
| Sepsis                                 | 0.665 | 0.497    | 0.89      |
| Respiratory                            | 0.721 | 0.56     | 0.928     |
| Renal                                  | 0.912 | 0.436    | 1.906     |
| Metabolic                              | 1.069 | 0.483    | 2.367     |

1. All patients with an ICU stay < 20 hours were excluded

**Table E 4 – Propensity matching of cohorts**

| <b>Comparison between matched cohorts</b> |                             |                  |
|-------------------------------------------|-----------------------------|------------------|
| <b>no paracetamol (n=4781)</b>            | <b>paracetamol (n=4781)</b> |                  |
| 60.18 (16.57)                             | 60.19 (18.7)                | Age              |
| 38% (1798)                                | 36% (1741)                  | AP3_Cardiovasc   |
| 18% (864)                                 | 18% (880)                   | AP3_Gastrointe   |
| 0% (10)                                   | 0% (8)                      | AP3_Haematolog   |
| 5% (253)                                  | 4% (187)                    | AP3_Metabolic    |
| 13% (620)                                 | 14% (673)                   | AP3_Respirator   |
| 6% (306)                                  | 7% (340)                    | AP3_sepsis       |
| 3% (161)                                  | 4% (174)                    | AP3_Trauma       |
| 8% (359)                                  | 7% (339)                    | ARF01            |
| 0% (2)                                    | 0% (4)                      | Burns            |
| 4% (206)                                  | 4% (194)                    | CardiacArrest    |
| 0 [0-0]                                   | 0 [0-0]                     | COMORB7          |
| 40% (1908)                                | 40% (1910)                  | ELECT01          |
| 26% (1246)                                | 27% (1295)                  | HOS_ADM_OthHOS   |
| 12% (575)                                 | 12% (582)                   | HOSPITAL_A       |
| 13% (610)                                 | 13% (621)                   | HOSPITAL_B       |
| 60% (2854)                                | 55% (2606)                  | HOSPITAL_C       |
| 17262.45 (1214.32)                        | 17392.41 (1038.74)          | ICU_AD_DT        |
| 16% (779)                                 | 15% (738)                   | ICU_ADM_EMERG    |
| 53% (2518)                                | 53% (2557)                  | ICU_ADM_OT       |
| 14% (649)                                 | 14% (653)                   | ICU_ADM_OthHOS   |
| 15% (736)                                 | 15% (739)                   | ICU_ADM_WARD     |
| 71% (3385)                                | 71% (3379)                  | INTUBATED01      |
| 14 [10-26]                                | 14 [10-26]                  | RR               |
| 27 [5-43]                                 | 29 [13-42]                  | SAPS2            |
| 3% (160)                                  | 3% (122)                    | TreatLimitorPall |
| 70% (3350)                                | 70% (3331)                  | VENTILATED01     |

**Details of propensity matching**

Overall, 4781/5772 (83%) of patients that did not receive paracetamol were matched on a 1:1 basis with 4781 patients that did receive paracetamol.

Patients were matched via propensity score with each patient matched to within +/-5%.

**Details of matched analysis**

4781/5772 (83%) of patients that did not receive paracetamol were matched on a 1:1 basis with 4781 patients that did receive paracetamol.

Patients were matched via propensity score with each patient matched to within +/-5%.

As can be seen in Table 1, patients were reasonably-well matched for the confounding variables that were used to develop the propensity score.

Matched analysis was performed using logistic regression and Cox-proportional hazards regression with adjustment for matching strata.

Results are present as raw and adjusted Odds Ratios (Hospital mortality) (adjusting for APACHE II, hospital, surgical patient, infection as admission diagnosis, presence of fever, APACHE III admission diagnosis group, treatment limitation)

Results are also present as raw and adjusted Hazard Ratios (Time to death) (adjusting for APACHE II, hospital, surgical patient, infection as admission diagnosis, presence of fever, APACHE III admission diagnosis group, treatment limitation) with paracetamol usage treated as a time dependent variable.

| <b>OR raw</b>       | <b>P-raw</b> | <b>OR adj</b>       | <b>P-adj</b> | <b>HR raw</b>       | <b>P-raw</b> | <b>HR adj</b>       | <b>p adj</b> |
|---------------------|--------------|---------------------|--------------|---------------------|--------------|---------------------|--------------|
| 0.67<br>(0.60-0.75) | <0.0001      | 0.57<br>(0.46-0.71) | <0.0001      | 0.51<br>(0.45-0.59) | <0.0001      | 0.68<br>(0.54-0.87) | 0.002        |

**Table E5: Adjusted odds ratio and hazards ratio for in-hospital mortality with paracetamol administration as a time-dependent variable**

|                                           | N     | Adjusted HR (95%CI) | P value |
|-------------------------------------------|-------|---------------------|---------|
| All <sup>a</sup>                          | 15818 | 0.68 (0.61-0.75)    | <0.0001 |
| Surgery <sup>b</sup>                      |       |                     |         |
| Yes                                       | 9994  | 0.64 (0.53-0.77)    | <0.0001 |
| No                                        | 5824  | 0.72 (0.64-0.81)    | <0.0001 |
| Fever <sup>c</sup>                        |       |                     |         |
| Yes                                       | 4397  | 0.84 (0.72-0.98)    | <0.0239 |
| No                                        | 11421 | 0.58 (0.50-0.66)    | <0.0001 |
| Medical, fever_and_infection <sup>d</sup> | 681   | 0.70 (0.49-0.99)    | <0.0416 |

**Table E6**

Multivariable Cox proportional hazards model with paracetamol use as a time dependent parameter with adjustments for form of delivery (intravenous [IV] or enteral), different body temperature at any time, different APACHE score tertiles and presence or absence of cirrhosis. These data are to be seen as additional to the previous model upon which they are superimposed.

| Parameter           | Estimate | SE   | Chi sq. | Prob | HR          | HRCL        | HRUCL       | global P     | Model                                   |
|---------------------|----------|------|---------|------|-------------|-------------|-------------|--------------|-----------------------------------------|
| panUsage_TimeDepend | -0.39    | 0.05 | 59.26   | 0.00 | <b>0.68</b> | <b>0.61</b> | <b>0.75</b> | <b>0.000</b> | <b>All</b>                              |
| panUsage_TimeDepend | -0.51    | 0.10 | 28.92   | 0.00 | <b>0.60</b> | <b>0.50</b> | <b>0.72</b> | <b>0.000</b> | <b>IV delivery only</b>                 |
| panUsage_TimeDepend | -0.37    | 0.05 | 48.43   | 0.00 | <b>0.69</b> | <b>0.62</b> | <b>0.76</b> | <b>0.000</b> | <b>enteral delivery only</b>            |
| panUsage_TimeDepend | -0.43    | 0.07 | 34.30   | 0.00 | <b>0.65</b> | <b>0.57</b> | <b>0.75</b> | <b>0.000</b> | <b>TempUnd35_any</b>                    |
| panUsage_TimeDepend | -0.36    | 0.18 | 4.15    | 0.04 | <b>0.70</b> | <b>0.49</b> | <b>0.99</b> | <b>0.042</b> | <b>Temp&gt;38, medical &amp; infect</b> |
| panUsage_TimeDepend | -0.32    | 0.06 | 28.95   | 0.00 | <b>0.72</b> | <b>0.64</b> | <b>0.81</b> | <b>0.000</b> | <b>by Surgery (no)</b>                  |
| panUsage_TimeDepend | -0.45    | 0.10 | 21.40   | 0.00 | <b>0.64</b> | <b>0.53</b> | <b>0.77</b> | <b>0.000</b> | <b>by Surgery (yes)</b>                 |
| panUsage_TimeDepend | -0.54    | 0.06 | 70.91   | 0.00 | <b>0.58</b> | <b>0.52</b> | <b>0.66</b> | <b>0.000</b> | <b>by TempOv38.3_Any (no)</b>           |
| panUsage_TimeDepend | -0.12    | 0.09 | 1.84    | 0.18 | <b>0.88</b> | <b>0.74</b> | <b>1.06</b> | <b>0.175</b> | <b>by TempOv38.3_Any (yes)</b>          |
| panUsage_TimeDepend | -0.52    | 0.06 | 74.96   | 0.00 | <b>0.59</b> | <b>0.53</b> | <b>0.67</b> | <b>0.000</b> | <b>by TempOv38.5_Any (no)</b>           |
| panUsage_TimeDepend | -0.07    | 0.10 | 0.41    | 0.52 | <b>0.94</b> | <b>0.77</b> | <b>1.15</b> | <b>0.522</b> | <b>by TempOv38.5_Any (yes)</b>          |
| panUsage_TimeDepend | -0.55    | 0.07 | 60.25   | 0.00 | <b>0.58</b> | <b>0.50</b> | <b>0.66</b> | <b>0.000</b> | <b>by TempOv38_Any (no)</b>             |
| panUsage_TimeDepend | -0.18    | 0.08 | 5.10    | 0.02 | <b>0.84</b> | <b>0.72</b> | <b>0.98</b> | <b>0.024</b> | <b>by TempOv38_Any (yes)</b>            |
| panUsage_TimeDepend | -0.48    | 0.05 | 77.59   | 0.00 | <b>0.62</b> | <b>0.56</b> | <b>0.69</b> | <b>0.000</b> | <b>by TempOv39_Any (no)</b>             |
| panUsage_TimeDepend | 0.11     | 0.15 | 0.58    | 0.45 | <b>1.12</b> | <b>0.84</b> | <b>1.49</b> | <b>0.446</b> | <b>by TempOv39_Any (yes)</b>            |
| panUsage_TimeDepend | -0.33    | 0.23 | 2.02    | 0.16 | <b>0.72</b> | <b>0.46</b> | <b>1.13</b> | <b>0.155</b> | <b>by apachetert (ap2=0-13)</b>         |
| panUsage_TimeDepend | -0.21    | 0.15 | 1.96    | 0.16 | <b>0.81</b> | <b>0.61</b> | <b>1.09</b> | <b>0.162</b> | <b>by apachetert (ap2=13-18)</b>        |
| panUsage_TimeDepend | -0.42    | 0.06 | 55.73   | 0.00 | <b>0.66</b> | <b>0.59</b> | <b>0.73</b> | <b>0.000</b> | <b>by apachetert (ap2&gt;18)</b>        |
| panUsage_TimeDepend | -0.43    | 0.05 | 66.56   | 0.00 | <b>0.65</b> | <b>0.59</b> | <b>0.72</b> | <b>0.000</b> | <b>by cirrhosis (no)</b>                |
| panUsage_TimeDepend | -0.77    | 0.19 | 17.29   | 0.00 | <b>0.46</b> | <b>0.32</b> | <b>0.66</b> | <b>0.000</b> | <b>by cirrhosis (yes)</b>               |

Temp Und35\_any = any episode of temperature under 35°C

Temp Ov38.3\_Any = any episode of temperature over 38.3°C

Temp Ov38.5\_Any = any episode of temperature over 38.5°C

Temp Ov39\_Any = any episode of temperature over 39°C

Apachetert = APACHE II value tertile

Ap2 = APACHE II score
